# Supplementary material
Source: PubMed Central journal article supplement (PMC4375082)
Supplement: supp_db14-0539_DB140539SupplementaryData.pdf [file supp_db14-0539_DB140539SupplementaryData.pdf]

SUPPLEMENTARY DATA

**Supplementary Figure 1. Immunoblot analysis of Sesn1 and Sesn2 proteins.** Sesn1/2 were analyzed in WT and Sesn3-LKO liver tissues by Western blots.

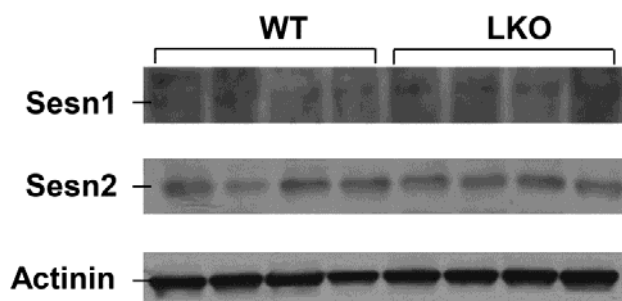

SUPPLEMENTARY DATA

**Supplementary Figure 2. The area-under-curve (AUC) analysis of the GTT and ITT data in main Fig. 2. A, B:** The AUC analysis of GTT and ITT data in chow and HFD fed WT and *Sesn3*-LKO mice. **C, D:** The AUC analysis of GTT and ITT data in chow and HFD fed WT and *TgSesn3* mice. Data are presented as mean  $\pm$  SEM. \* $P < 0.05$ , \*\* $P < 0.01$  and \*\*\* $P < 0.001$ .

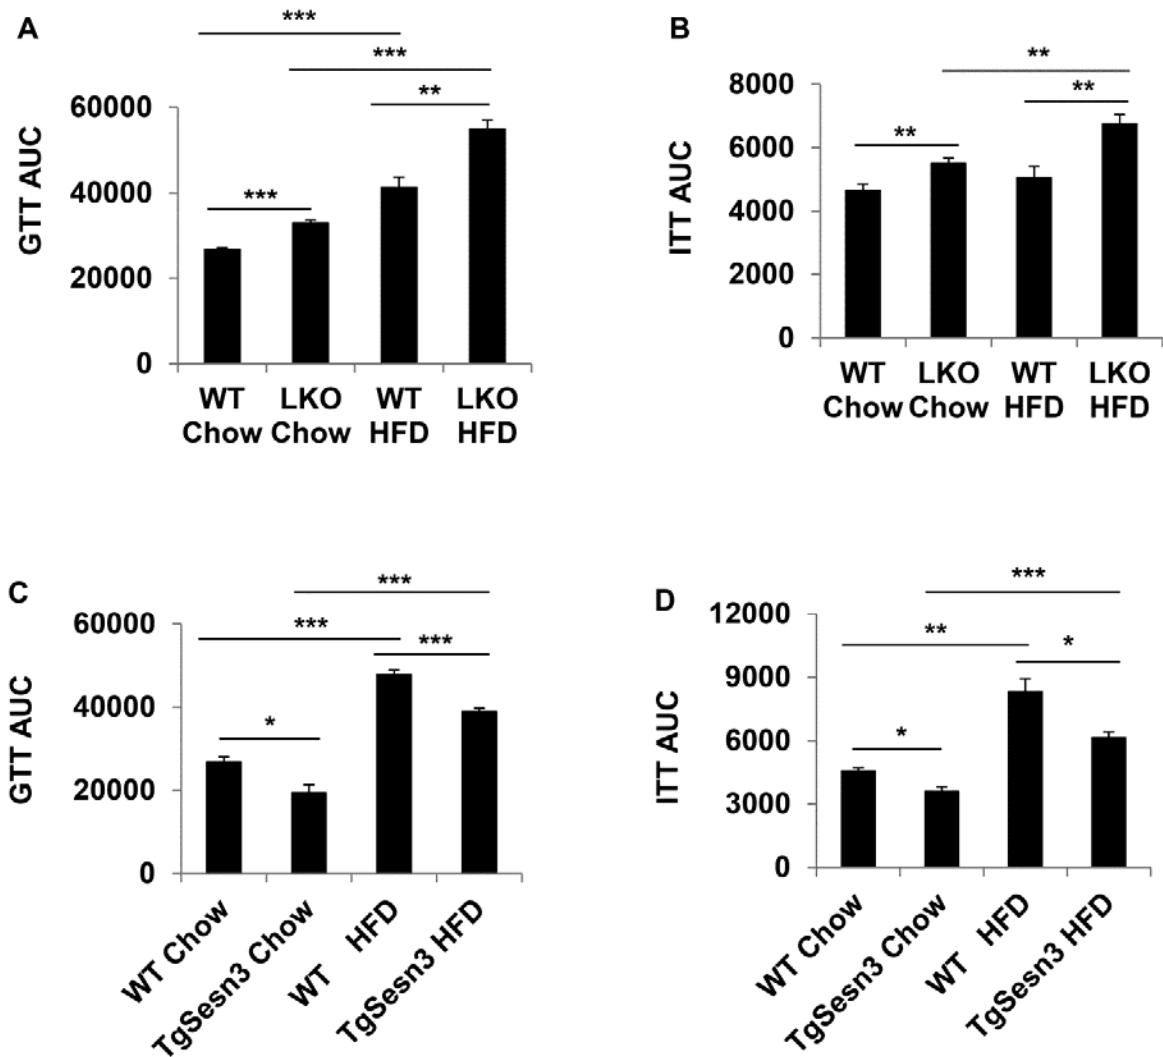

SUPPLEMENTARY DATA

**Supplementary Figure 3. Signaling analysis in skeletal muscle and white adipose tissue.** A-H: Akt and GSK3 phosphorylated and total protein levels were analyzed by Western blots in skeletal muscle and white adipose tissue from chow-fed WT, *Sesn3*-LKO, and *TgSesn3* mice under starvation and refeeding conditions.

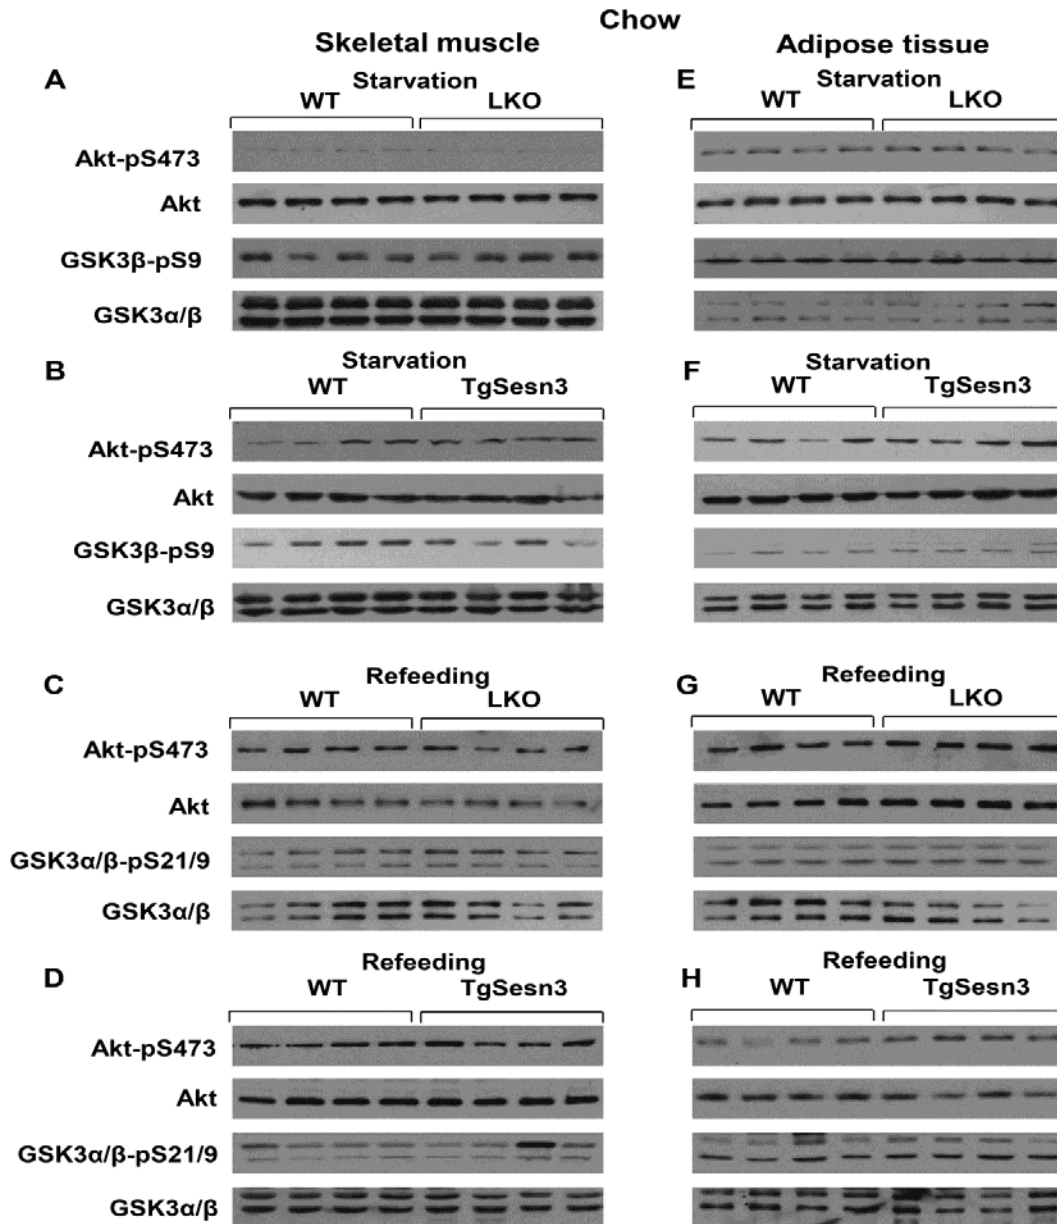

SUPPLEMENTARY DATA

**Supplementary Figure 4. Analysis of insulin signaling in chow-fed WT, *Sesn3*-LKO, and *TgSesn3* livers.** *A, B*: Western blot analysis of insulin signaling proteins in the liver of WT, *Sesn3*-LKO and *TgSesn3* mice after insulin stimulation, respectively. *C, D*: Quantitative analysis of panels *A* and *B*, respectively. Normalization was performed by calculating the ratio of each signaling event in the *Sesn3*-LKO or *TgSesn3* to that in the WT mice. Data are presented as mean  $\pm$  SEM. \* $P < 0.05$ .

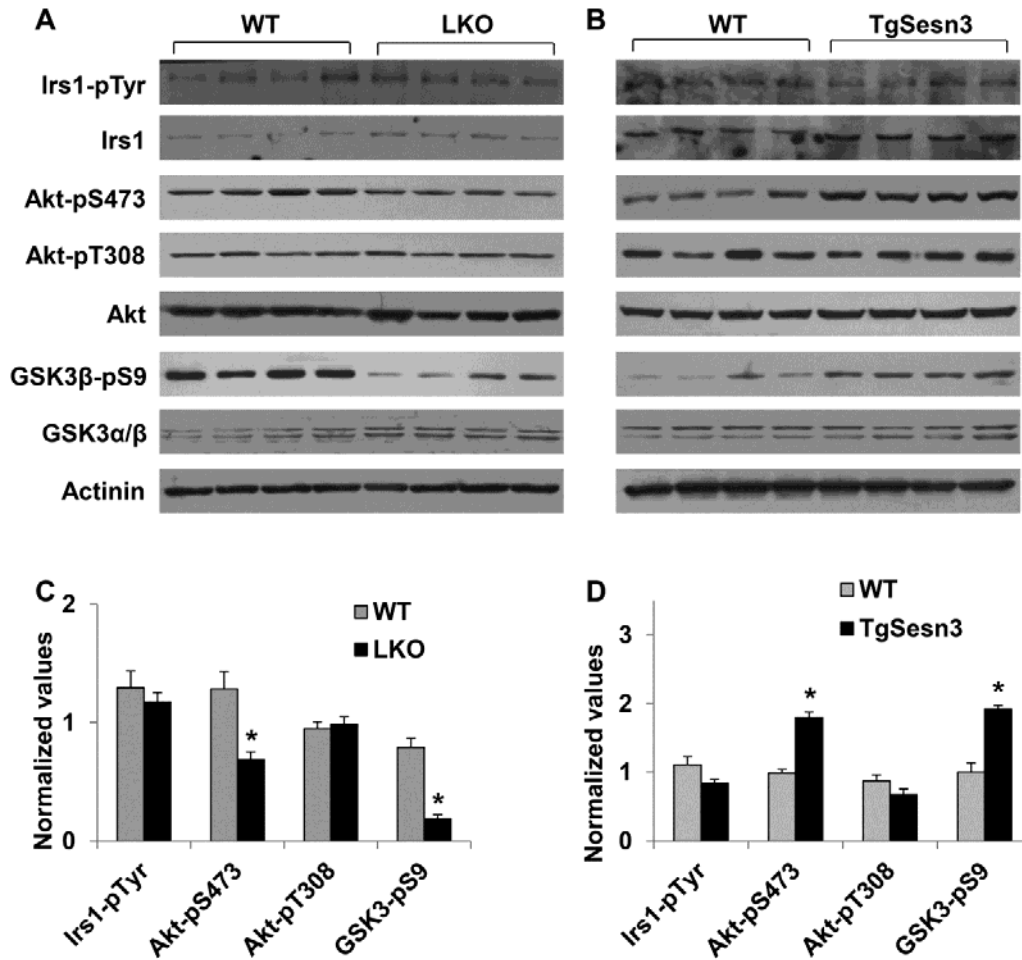

SUPPLEMENTARY DATA

**Supplementary Figure 5. Insulin signaling analysis in HFD-fed WT and TgSesn3 mice.** *A:* Western blot analysis of insulin signaling in the liver of WT and TgSesn3 mice fed with a HFD. *B:* Quantitative analysis of Panel A. Normalization was performed by calculating the ratio of each signaling event to that in the insulin-stimulated WT mice. *C, D:* Insulin signaling analysis in skeletal muscle and white adipose tissue of HFD-fed WT and TgSesn3 mice by Western blots, respectively. Data are presented as mean  $\pm$  SEM. \* $P < 0.05$ .

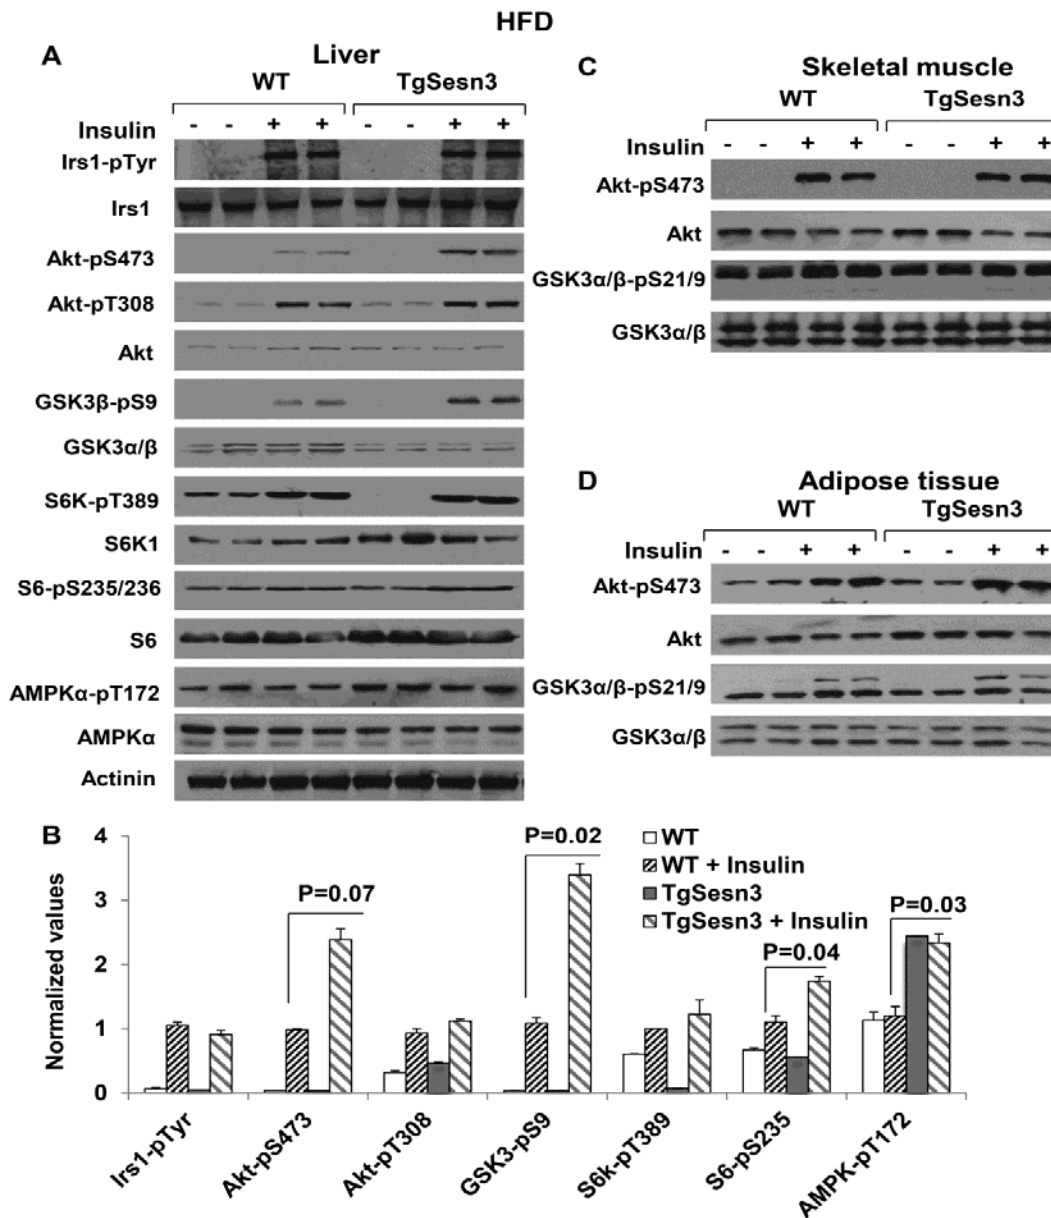

SUPPLEMENTARY DATA

**Supplementary Figure 6. The AUC analysis of GTT and ITT data in main Figure 5 (C and D). A, B:** The AUC presentation of the GTT and ITT data in WT and AMPK-LDKO mice. Data are presented as mean  $\pm$  SEM. \*\*\* $P$ <0.001.

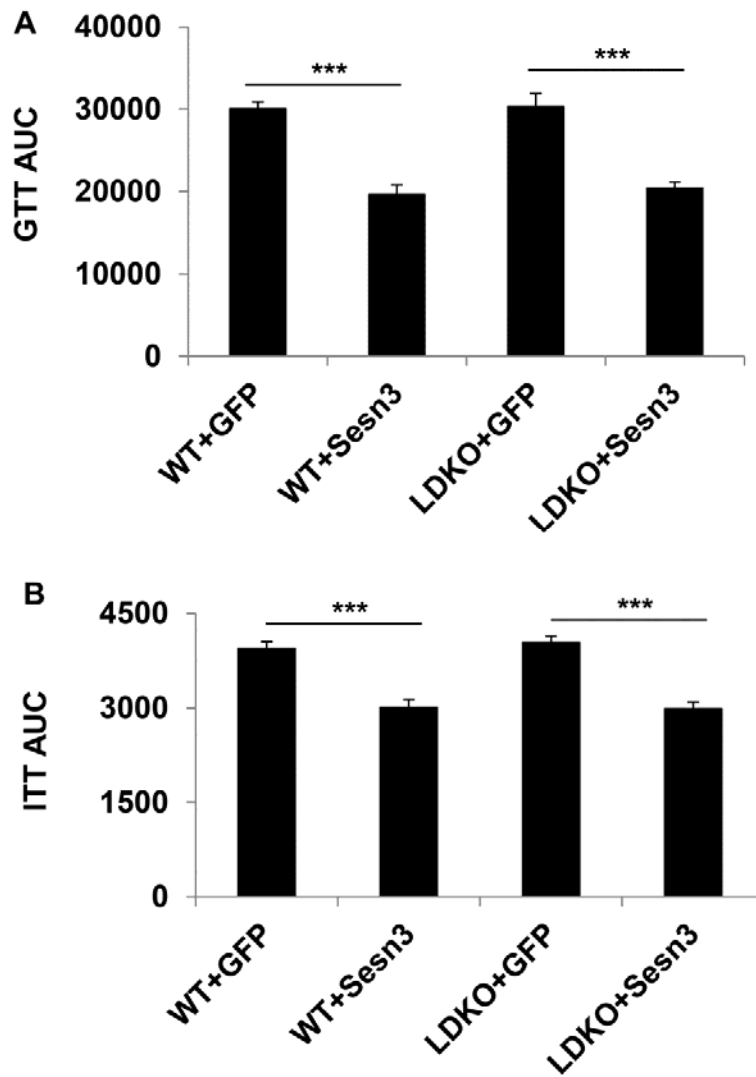

SUPPLEMENTARY DATA

**Supplementary Figure 7. Quantitative analysis of insulin signaling in the liver of WT and AMPK-LDKO mice.** The quantitative analysis was performed for Panels E and F in main Figure 5. Normalization was performed by calculating the ratio of each signaling event to that in the GFP-transduced WT mice. Data are presented as mean  $\pm$  SEM. \* $P$ <0.05.

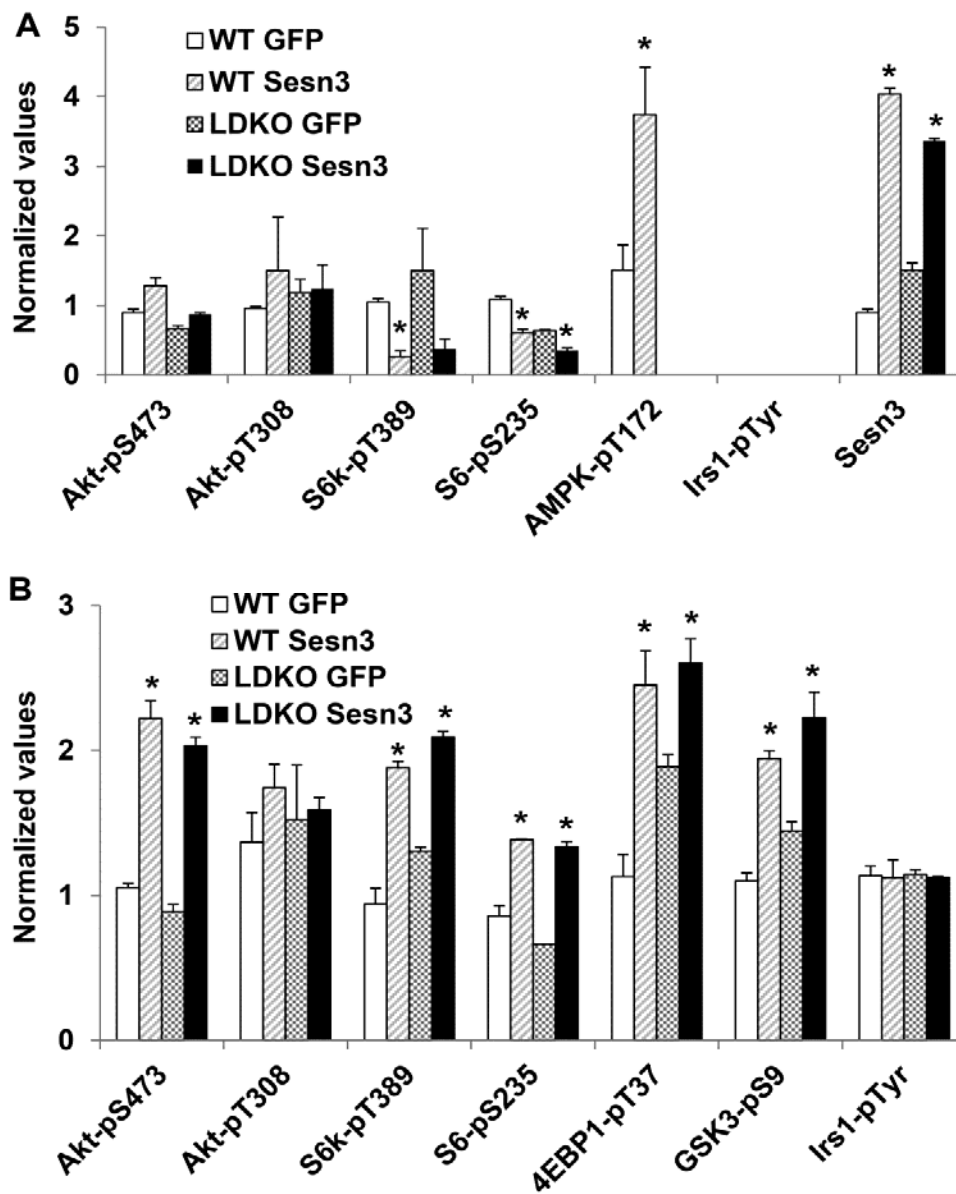

SUPPLEMENTARY DATA

**Supplementary Figure 8. Microscopic analysis of colocalization of Sesn3 and mTORC2 complex.** (A-C) HEK293T cells were seeded on coated glass cover slips and then transfected with mCherry-Sesn3 and GFP-Rictor, GFP-Sin1 or GFP-Protor1 plasmids. Fluorescence was recorded using a confocal microscope.

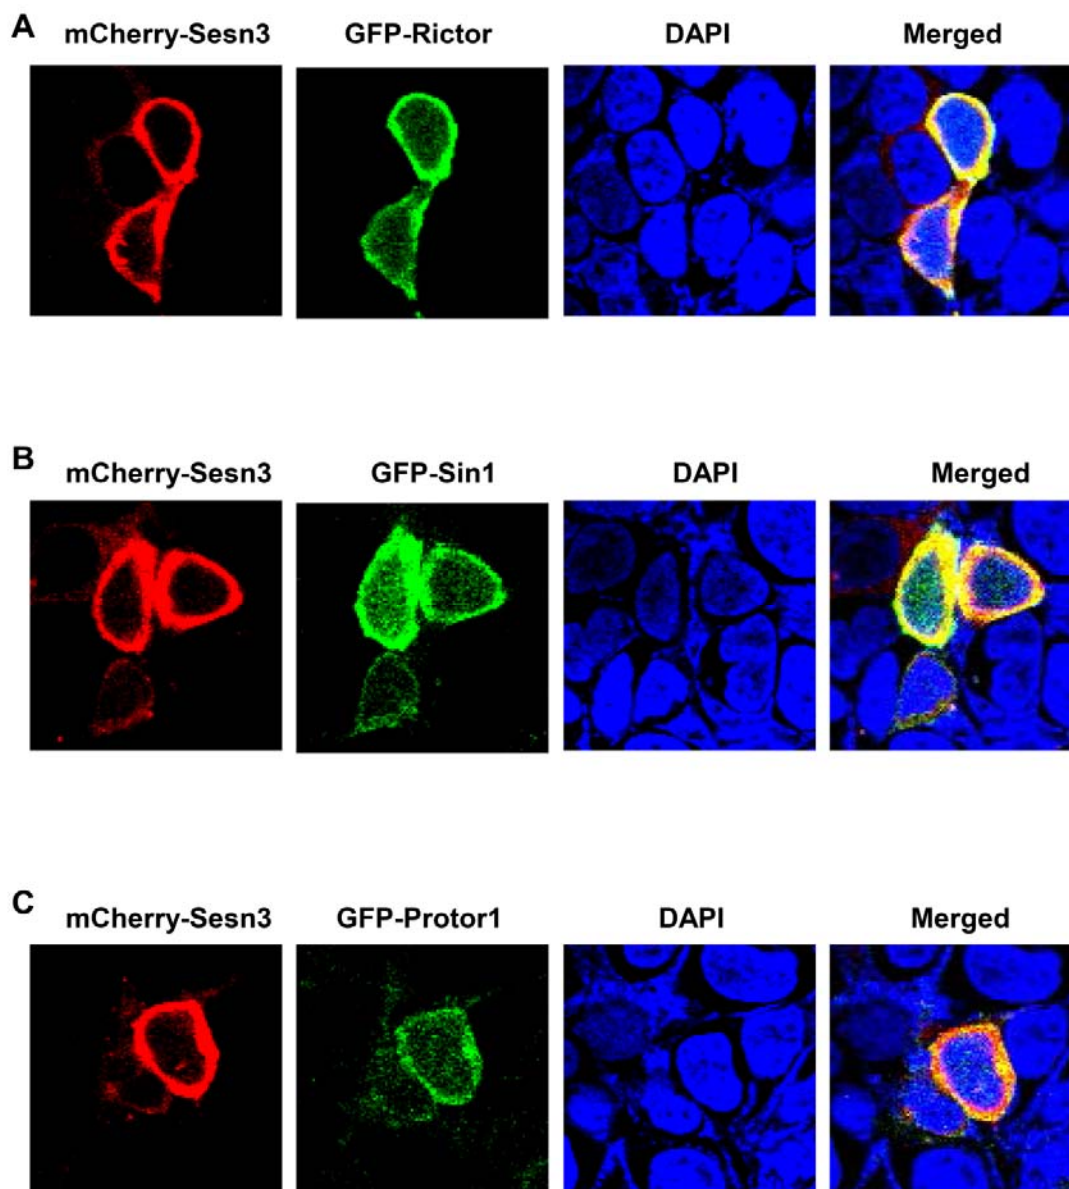



SUPPLEMENTARY DATA

**Supplementary Figure 9. Analysis of Sesn3/mTORC2/Akt interactions.** *A:* IP analysis of Sesn3-mTORC2 interaction in mouse primary hepatocytes transduced with shGFP (GFP shRNA) or shSin1 (Sin1 shRNA) adenoviruses together with GFP or Sesn3 expressing adenoviruses. *B:* IP analysis of Sesn3-mTORC2 interaction in mouse primary hepatocytes transduced with shGFP or shmTOR (mTOR shRNA) adenoviruses together with GFP or Sesn3 expressing adenoviruses.

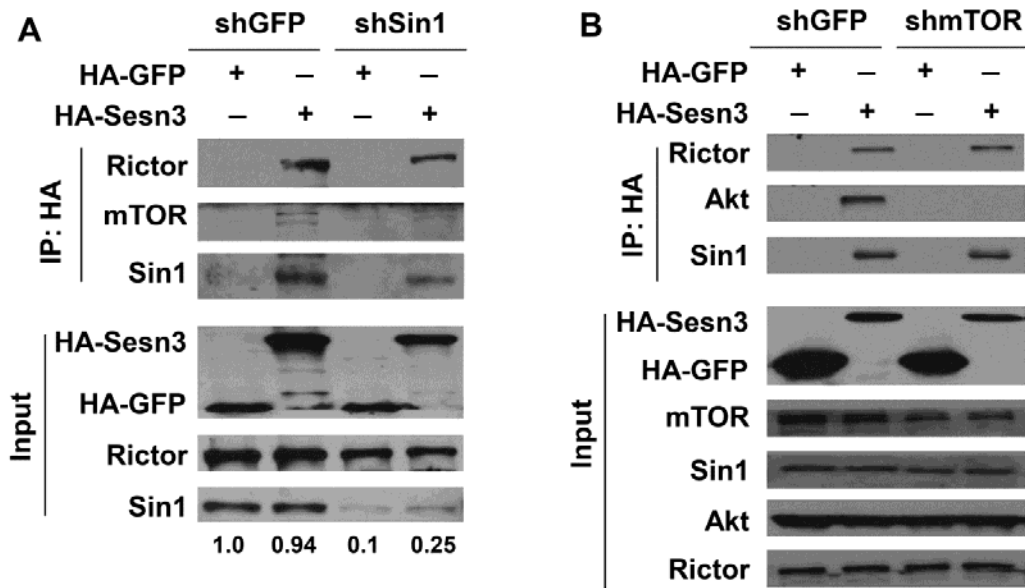

SUPPLEMENTARY DATA

**Supplementary Figure 10. Confirmation of Sesn2/3-mTORC2 interactions.** Specific sestrin-mTORC2 interaction was analyzed in mouse primary hepatocytes transduced with either shGFP, shSesn2, or shSesn3 by IP using specific antibodies against Sesn2 and Sesn3.

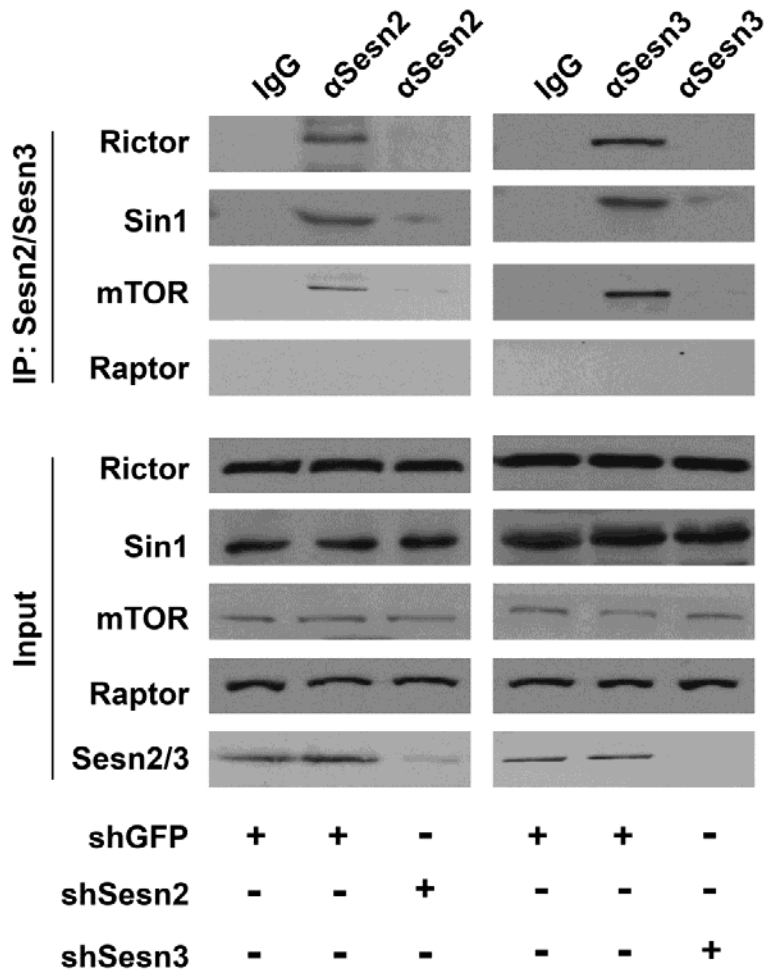

SUPPLEMENTARY DATA

**Supplementary Table 1.**

| <b>Primer Name</b>             | <b>Sequence (5' to 3')</b>                                   |
|--------------------------------|--------------------------------------------------------------|
| pShuttle-mSesn3HA-F1           | ATCAGCTAGCCACCATGAACCGCGGTGGCAG                              |
| pShuttle-mSesn3HA-R1           | ATCACTCGAGGGTCAGATGCCGAGTTATGGC                              |
| pcDNA-mSesn3HA-from-Shuttle-F1 | ATCTGCGGCCGCAGTA                                             |
| pcDNA-mSesn3HA-from-Shuttle-R1 | ATCTGCGGCCGCTATTAAGCGTAGTCAGGTACATC                          |
| pcDNA-FLAG-mSesn3-F1           | ATCAGCTAGCAACCGCGGTGGCAGCAG                                  |
| pcDNA-FLAG-mSesn3-R1           | ATCACTCGAGTCAGGTCAGATGCCGAGTTATGGCTC                         |
| pShuttle-FLAG-mSesn3-F1        | TCTATGGATATCGCCGCCACCATGGATTATAAAG                           |
| pShuttle-FLAG-mSesn3-R1        | CCCTCTAGATGCATGCTCGAG                                        |
| pcDNA-FLAG-mAkt1-F1            | ATCGGCTAGCAACGACGTAGCCATTGTGAAG                              |
| pcDNA-FLAG-mAkt1-R1            | ATCGGCTAGCTCAGGCTGTGCCACTGG                                  |
| pcDNA-FLAG-mAkt2-F1            | ATCGGCTAGCAATGAGGTATCTGTCATCAAAGAAG                          |
| pcDNA-FLAG-mAkt2-R1            | ATCGGCTAGCTCACTCTCGGATGCTGG                                  |
| pcDNA-FLAG-mPdpk1-F1           | ATCAGCTAGCATGGCCAGGACCACCAGC                                 |
| pcDNA-FLAG-mPdpk1-R1           | ATCACTCGAGTCACTGCACAGCAGCATCTG                               |
| pcDNA-FLAG-mPras40-F1          | ATCAGCTAGCATGGCGTCTGGGCGGCCA                                 |
| pcDNA-FLAG-mPras40-R1          | ATCACTCGAGTTAATATTTCCGTTTCTGGAAGTCG                          |
| pcDNA-mProtor1-FLAG-F1         | TAGCGGCCCCATGAGGACTCTCCGAGGTTGA                              |
| pcDNA-mProtor1-FLAG-R1         | AATTGCTAGCCACAACACTTGCCCGCCT                                 |
| pcDNA3-NSF-mSin1-F1-NheI       | ATC AGC TAG CAT GGC CTT CTT GGA CAA TCC AAC                  |
| pcDNA3-NSF-mSin1-R1-XhoI       | ATC ACT CGA GTC ACT GCT GCC CTG ATT TCT TC                   |
| pShuttle-mSin1-F1              | TCTATGGCTAGCGCCGCCACCATGGATTATAAAG                           |
| pShuttle-mSin1-R1              | CCCTCTAGATGCATGCTCGAG                                        |
| mSesn3-shRNA2-top              | CACCGGAGAAGAACATTTGCCAACATTCAAGAGATGTTGGCAAATGTTCTTCTCC      |
| mSesn3-shRNA2-bottom           | AAAAGGAGAAGAACATTTGCCAACATCTTTGAATGTTGGCAAATGTTCTTCTCC       |
| mSin1-shRNA1-top               | CACCGCCGAAGCTCAATGACAATGTTTCAAGAGAACATTGTCATTGAGCTTCGGC      |
| mSin1-shRNA1-bottom            | AAAAGCCGAAGCTCAATGACAATGTTTCTTGAACATTGTCATTGAGCTTCGGC        |
| mMtor-shRNA2-top               | CACCGCATGACAAGTACTGCAAAGATTCAAGAGATCTTTCAGTACTTGTTCATGC      |
| mMtor-shRNA2-bottom            | AAAAGCATGACAAGTACTGCAAAGATCTTGAATCTTTCAGTACTTGTTCATGC        |
| mRictor-shRNA2-top             | CACCCAGGCCAGACCTCATGGACAATCAAGAGATTGTCCATGAGGTCTGGCCTG       |
| mRictor-shRNA2-bottom          | AAAACAGGCCAGACCTCATGGACAATCTTGAATTGTCCATGAGGTCTGGCCTG        |
| pET24-mProtor1-F1              | GCTGGAATTCGCCGCCA                                            |
| pET24-mProtor1-R1              | TCTCAAGCTTTTTATCATCATCATCTTTATAATCCTCTCCG                    |
| pET24-RICTOR-C900-F1           | TATAGGATCCATGGATTATAAAGATGATGATGATAAACTCTCCATTCCAAAAGGATTTTC |
| pET24-RICTOR-C900-R1           | TATACTCGAGGGATTACAGCAGATGTATCAACTATA                         |
| pET24-mSin1-F1                 | GCTGGAATTCGCCGCCA                                            |
| pET24-mSin1-R1                 | ATTACTCGAGCTGCTGCCCTGATTTCTTCTCC                             |
| pET24-mSesn3-F1                | ATCAGCTAGCAACCGCGGTGGCAGCAG                                  |
| pET24-mSesn3-R1                | ATCACTCGAGGGTCAGATGCCGAGTTATGGC                              |

SUPPLEMENTARY DATA

|                       |                                           |
|-----------------------|-------------------------------------------|
| pEGFP-mSin1-F1        | TATACTCGAGGCCTTCTTGACAATCCAACAT           |
| pEGFP-mSin1-F1        | TATCGGTACCTAACTGCACATCCGTCGTG             |
| pEGFP-mProtor1-F1     | GCTGGAATTCGCCGCCA                         |
| pEGFP-mProtor1-R1     | TCTCAAGCTTTTTATCATCATCATCTTTATAATCCTCTCCG |
| pLP-mCherry-mSesn3-F1 | ATGGCGCGCCAACCGCGGTGGCAGCA                |
| pLP-mCherry-mSesn3-R1 | GCTTAATTAATCAGGTCAGATGCCGAGTTATGG         |
| mSesn3-qPCR-F2        | GGATGTTGACACGACCACAC                      |
| mSesn3-qPCR-B2        | TAAACCTTCAGGCTCCGTTC                      |
| mSesn3-Loxp-PCR-F1    | CAGAAACCTGCAGTTGTG                        |
| mSesn3-Loxp-PCR-R1    | CCATAATGCAACACTAAGTCA                     |
| mSesn3-Tg-PCR-F1      | AAGGGAGCTGCAGTGGAGTA                      |
| mSesn3-Tg-PCR-R1      | CTTTAAGCCTGCCCAGAAGA                      |
| mSesn3-Tg-PCR-R2      | GGAAAGTCCCTATTGGCGTTA                     |
| AMPKa1-loxp-PCR-F1    | CCCACCATCACTCCATCTCT                      |
| AMPKa1-loxp-PCR-F1    | AGCCTGCTTGGCACACTTAT                      |
| AMPKa2-loxp-PCR-F1    | GCAGGCGAATTTCTGAGTTC                      |
| AMPKa2-loxp-PCR-F1    | TCCCCTGAACAAGCATACC                       |
| Cre-PCR-Primer 42     | CTAGGCCACAGAATTGAAAGATCT                  |
| Cre-PCR-Primer 43     | GTAGGTGGAAATTCTAGCATCATCC                 |
| Cre-PCR-Primer 567    | ACCAGCCAGCTATCAACTCG                      |
| Cre-PCR-Primer 568    | TTACATTGGTCCAGCCACC                       |
